# Supplementary material
Source: publisher site journal article supplement (https://www.dovepress.com/article/281466)
Supplement: Supplementary file 1 [file get_supplementary_file.php]

Supplementary material: Comparisons of the mean outcomes between the citizens and experts for 14 screening and counselling intervention during the first Delphi round.

Figure S1: Comparisons of the mean outcomes between the citizens (n=14) and experts (n=9) for screening for anemia

Figure S2: Comparisons of the mean outcomes between the citizens (n=12) and experts (n=9) for screening for parodontitis

Figure S3: Comparisons of the mean outcomes between the citizens (n=12) and experts (n=9) for screening for lipid disorders

Figure S4: Comparisons of the mean outcomes between the citizens (n=12) and experts (n=9) for screening for and counseling on obesity

Figure S5: Comparisons of the mean outcomes between the citizens (n=12) and experts (n=9) for screening for and counseling on alcohol consumption

Figure S6: Comparisons of the mean outcomes between the citizens (n=13) and experts (n=10) for screening for age-related vision impairment

Figure S7: Comparisons of the mean outcomes between the citizens (n=12) and experts (n=10) for screening for glaucoma

Figure S8: Comparisons of the mean outcomes between the citizens (n=12) and experts (n=10) for screening for hearing impairment

Figure S9: Comparisons of the mean outcomes between the citizens (n=12) and experts (n=10) for screening for hepatitis C

Figure S10: Comparisons of the mean outcomes between the citizens (n=12) and experts (n=10) for screening for depression

Figure S11: Comparisons of the mean outcomes between the citizens (n=12) and experts (n=10) for counseling on physical activity

Figure S12: Comparisons of the mean outcomes between the citizens (n=12) and experts (n=10) for screening for vitamin D deficiency

Figure S13: Comparisons of the mean outcomes between the citizens (n=11) and experts (n=10) for screening for osteoporosis

Figure S14: Comparisons of the mean outcomes between the citizens (n=11) and experts (n=10) for screening for chronic kidney diseases or urinary tract infections
